# Supplementary material for: Optimised uncertainty at minimum overall cost to achieve fitness-for-purpose in food analysis
Source: Royal Society of Chemistry journal article supplement (doi:10.1039/b104285h), 2001-01-01
Supplement: fig1.doc [file fig1.doc]

Concentration

cm + U



Batch rejected

Meas. conc cm cconc



Threshold T



True conc ct



True conc ct

Batch accepted

Meas. conc cm

cm - U

False

Positive

False

Negative

Figure 1.
